# Supplementary material for: Molecular-switch-embedded organic Schottky barrier transistors for a high switching ratio
Source: Royal Society of Chemistry journal article supplement (doi:10.1039/d5mh01504a), 2025-10-03
Supplement: d5mh01504a1.pdf [file d5mh01504a1.pdf]

## Electronic Supplementary Information (ESI)

### **Molecular-Switch-Embedded Organic Schottky Barrier Transistors for High Switching Ratio**

Hye Ryun Sim, Syed Zahid Hassan, Sangjun Lee, Jieun Kwon, Geon-Hee Nam, Seyeon Baek, Chan So, Young Gyoung Lee and Dae Sung Chung\*

Department of Chemical Engineering, Pohang University of Science and Technology (POSTECH), Pohang 37673,  
Republic of Korea

\*Correspondence: dchung@postech.ac.kr (D. S. Chung)

## Experimental Section

### Materials

DPP-DTT was sourced from Ossila. Chlorobenzene (CB) and toluene were purchased from Sigma-Aldrich. ODTS was purchased from Alfa Aesar. The AgNW solution in isopropyl alcohol (IPA) was acquired from Sg Flexio, featuring a concentration of 0.5 wt%, a length of 25  $\mu\text{m}$ , and a diameter of 25 nm. This solution was subsequently diluted to achieve an optimized concentration of 0.25  $\text{mg mL}^{-1}$  in IPA.<sup>1</sup> All materials were used without further purification. The synthetic method for DAE-316 can be found in our previously published paper.<sup>5</sup>

### Device Fabrication

For the OSBTs, highly doped silicon wafers ( $\text{Si}^{++}$ ) with a thermally grown  $\text{SiO}_2$  layer of 100 nm thickness used as substrates. These  $\text{SiO}_2/\text{Si}^{++}$  substrates were cut into 2 cm  $\times$  2 cm squares and cleaned using a piranha solution, followed by treatment in a mixture of sulfuric acid ( $\text{H}_2\text{SO}_4$ ) and 30% hydrogen peroxide ( $\text{H}_2\text{O}_2$ ) at a ratio of 7:3. The substrates underwent  $\text{O}_2$  plasma exposure for 10 min. After cleaning, they were immersed in a 10  $\mu\text{M}$  ODTS-based self-assembled monolayer (SAM) solution, using toluene as the solvent. To eliminate any residual solvent, all substrates were annealed at 150  $^\circ\text{C}$  for 30 min. Subsequently, the AgNW film was deposited onto the SAM-treated substrates by spin coating the diluted AgNW solution at 2000 rpm for 30 s. This was followed by annealing at 120  $^\circ\text{C}$  for 5 min to remove the residual solvent. For the active layer, solutions of DPP-DTT and DAE mixed at various concentrations were dissolved in CB for more than 3 days, with a DPP-DTT concentration of 9  $\text{mg mL}^{-1}$ . The DPP-DTT/DAE films were deposited onto the AgNWs by spin coating at 1000 rpm for 60 s in a nitrogen glove box. All semiconductor films were not subjected to annealing treatment. To ensure that the source contact was deposited only on the AgNW and not directly on the semiconductor, the sample was immersed in CB solvent for patterning the semiconductor. Finally, a drain electrode consisting of a DMD configuration ( $\text{MoO}_3$  5 nm / Ag 10 nm /  $\text{MoO}_3$  40 nm) was deposited onto the active layer, and a silver source contact electrode was deposited onto the areas of the AgNWs where the semiconductor had been removed using thermal evaporation under high vacuum. The active area of the fabricated OSBT was 500  $\mu\text{m} \times$  500  $\mu\text{m}$ .

### Device Characterization

The electrical characteristics were measured using a semiconductor parameter analyzer (Keysight B1500A) within a nitrogen glove box. AFM (Jupiter XR) and OM (Zeiss Axioplan) were utilized to analyze the surface morphology. 2D-GIXD was conducted at the 3C and 9A beamlines of the Pohang Accelerator Laboratory (PAL) in Korea. A Thermo Scientific Evolution 220 UV-vis spectrophotometer was used to obtain the UV-vis absorption spectra. UV irradiation was provided by a 312 nm handy lamp (6 W, Vilber Lourmat), and visible irradiation was applied using a 520 nm continuous-wave laser (500 mW max, Shanghai Laser & Optics Century Co., Ltd.).

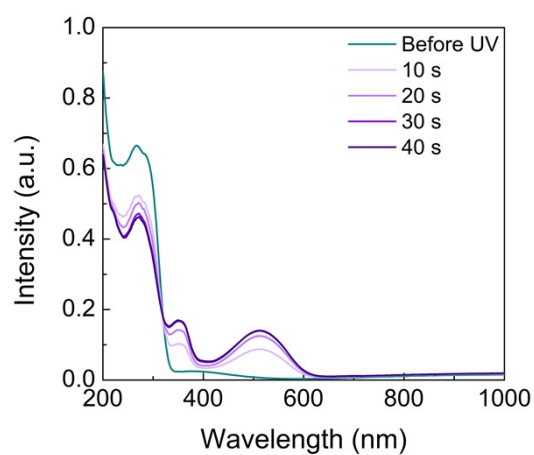

**Fig. S1.** UV-vis absorption spectra of the DAE-316 film under continuous UV light exposure over time.

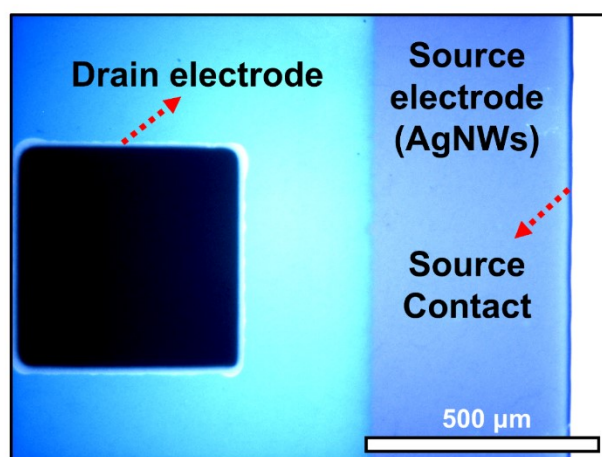

**Fig. S2.** Optical microscope image of photoprogrammable OSBT.

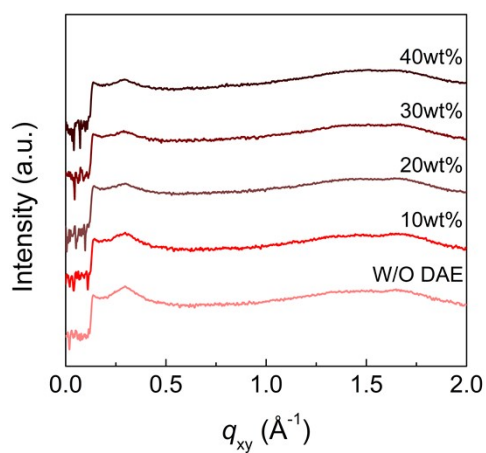

**Fig. S3.** In-plane direction line-cut profiles of the DPP-DTT film with DAE as a function of DAE concentration.

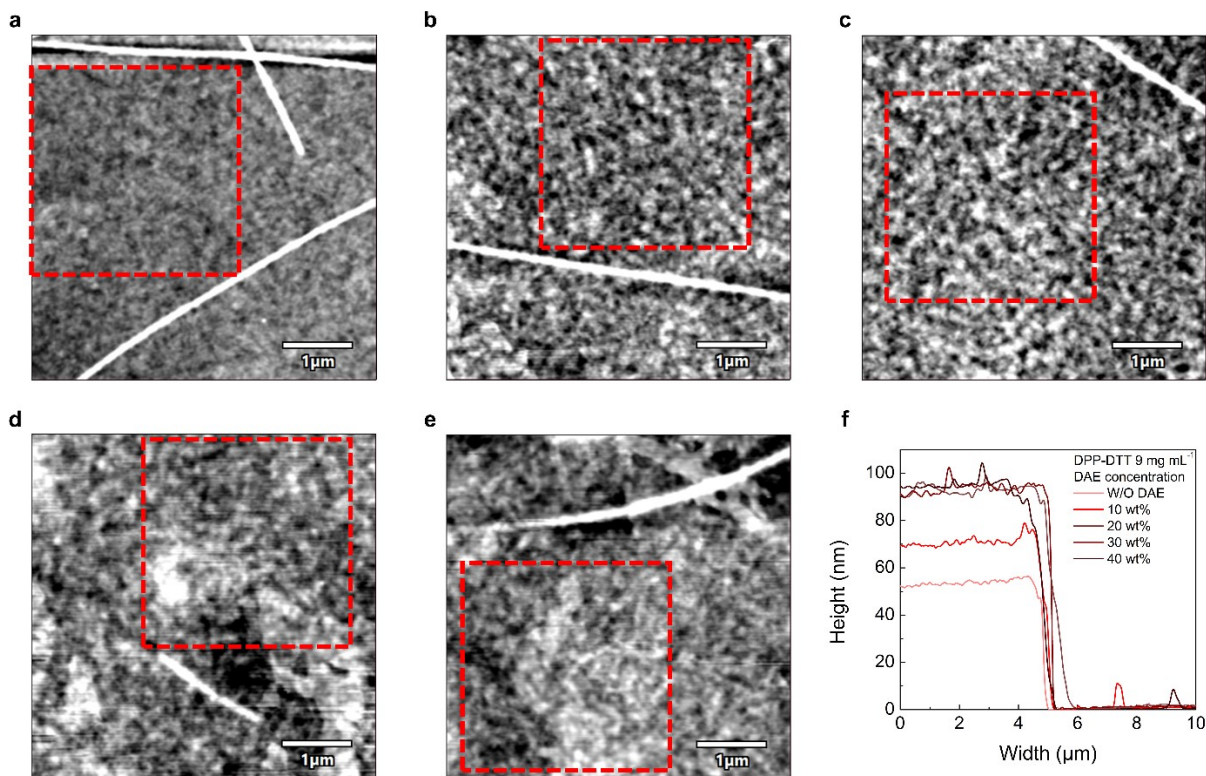

**Fig. S4.** Atomic force microscopy (AFM) images of the DPP-DDT film: (a) without DAE, (b) 10 wt% DAE, (c) 20 wt% DAE, (d) 30 wt% DAE, (e) 40 wt% DAE. Roughness was assessed in the dashed region. (f) Height profiles of DPP-DDT films without DAE and at varying concentration DAE, extracted from AFM images.

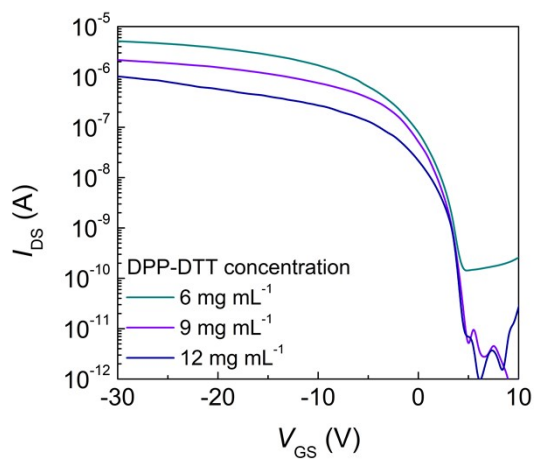

**Fig. S5.** Transfer characteristics of OSBTs utilizing DPP-DDT with varying concentrations of the DPP-DDT solution.

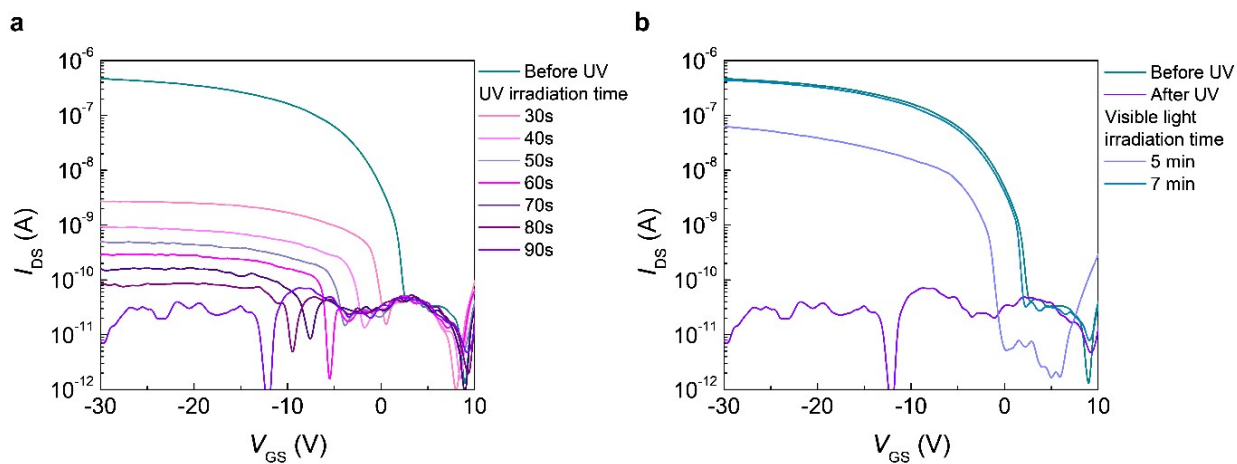

**Fig. S6.** Transfer characteristics of the OSBT with DAE 30 wt% under continuous UV and visible light exposure over time.

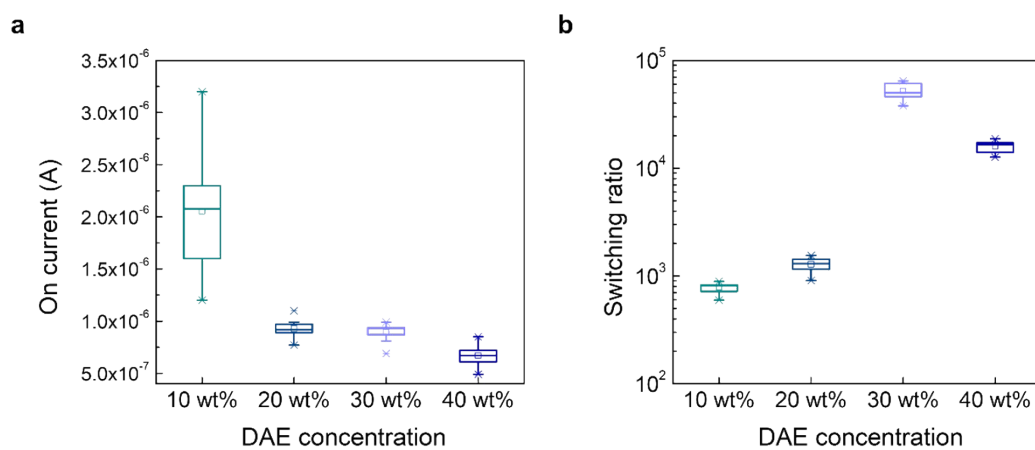

**Fig. S7.** Measurements of on-current and switching ratio for 10 devices at each DAE concentration, displayed as box plots.

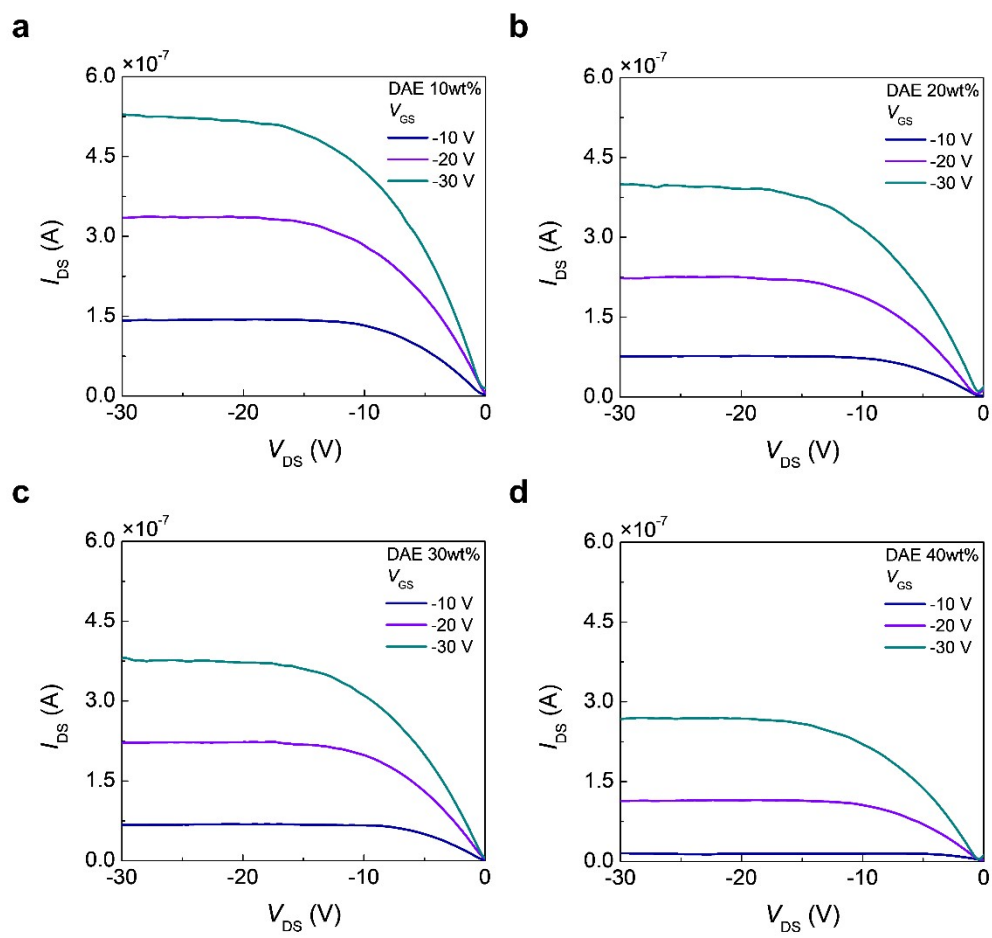

**Fig. S8.** Output characteristics of the OSBTs with varying concentrations: (a) 10 wt%, (b) 20 wt%, (c) 30 wt%, and (d) 40 wt% DAE-316.

**Table S1.** Crystallographic information of DPP-DTT films with varying DAE concentrations, extracted from 2D-grazing X-ray diffraction measurements.

| sample                     | $q_z$ (100)<br>$\text{\AA}^{-1}$ | $d_{\text{lamellar}}$<br>$\text{\AA}$ | $q_{xy}$ (010)<br>$\text{\AA}^{-1}$ | $d_{\pi-\pi}$<br>$\text{\AA}$ |
|----------------------------|----------------------------------|---------------------------------------|-------------------------------------|-------------------------------|
| DPP-DTT<br>without DAE     | 0.284                            | 22.13                                 | 1.651                               | 3.81                          |
| DPP-DTT<br>with DAE 10 wt% | 0.278                            | 22.59                                 | 1.650                               | 3.81                          |
| DPP-DTT<br>with DAE 20 wt% | 0.275                            | 22.84                                 | 1.649                               | 3.81                          |
| DPP-DTT<br>with DAE 30 wt% | 0.273                            | 23.01                                 | 1.647                               | 3.81                          |
| DPP-DTT<br>with DAE 40 wt% | 0.270                            | 23.24                                 | 1.634                               | 3.85                          |

**Table S2.** Summary of photoprogrammable OSBT performance with varying DAE concentrations. Each data was extracted from Figure 3.

| DAE<br>concentration | $I_{\text{on}}$ (DAE_o)<br>$\text{A}$ | $I_{\text{on}}$ (DAE_c)<br>$\text{A}$ | $I_{\text{off}}$ (DAE_o)<br>$\text{A}$ | Switching<br>ratio | On/off<br>ratio    |
|----------------------|---------------------------------------|---------------------------------------|----------------------------------------|--------------------|--------------------|
| 10 wt%               | $2.56 \times 10^{-6}$                 | $2.89 \times 10^{-9}$                 | $1.95 \times 10^{-11}$                 | 887                | $1.32 \times 10^5$ |
| 20 wt%               | $9.81 \times 10^{-7}$                 | $6.34 \times 10^{-10}$                | $2.37 \times 10^{-12}$                 | 1,547              | $4.14 \times 10^5$ |
| 30 wt%               | $9.35 \times 10^{-7}$                 | $1.45 \times 10^{-11}$                | $2.91 \times 10^{-12}$                 | 64,576             | $3.21 \times 10^5$ |
| 40 wt%               | $6.27 \times 10^{-7}$                 | $3.35 \times 10^{-11}$                | $2.62 \times 10^{-12}$                 | 18,717             | $2.40 \times 10^5$ |

**Table S3.** Summary of photoprogrammable performance of DAE-embedded organic transistors.

| System                       | Type     | Switching ratio     | Number of repeating steps | References |
|------------------------------|----------|---------------------|---------------------------|------------|
| P3HT/DAE-Me                  | Lateral  | approximately 10    | 4                         | 2          |
| F8T2/DAE-Me                  | Lateral  | approximately 1,000 | 4                         | 2          |
| F8T2/DL2                     | Lateral  | approximately 1,000 | 100                       | 3          |
| PCbD-IDTTP/DAE-Me            | Lateral  | 1,026               | 10                        | 4          |
| PCbD-IDTTP/DAE-316           | Lateral  | 2,588               | 150                       | 4          |
| DPP-DTT/DAE-Me               | Lateral  | approximately 100   | 4                         | 2          |
| DPP-DTT/DAE- <sup>t</sup> Bu | Lateral  | approximately 10    | 4                         | 2          |
| DPP-DTT/DAE-316              | Lateral  | 4,405               | 100                       | 5          |
| DPP-DTT/DAE-316              | Vertical | 64,576              | 100                       | This work  |

## References

- S1.** H. R. Sim, S. Lee, J. Lee, S. Z. Hassan, G.-H. Nam, C. So, K. M. Sim and D. S. Chung, *ACS Nano* 2023, **17**, 24374.
- S2.** L. Hou, T. Leydecker, X. Zhang, W. Rehak, M. Herder, C. Cendra, S. Hecht, I. McCulloch, A. Salleo, E. Orgiu and P. Samori, *J. Am. Chem. Soc.* 2020, **142**, 11050.
- S3.** S. Z. Hassan, J. Kwon, J. Lee, H. R. Sim, S. An, S. Lee and D. S. Chung, *Adv. Sci.* 2024, **11**, 24001482.
- S4.** S. H. Yu, S. Z. Hassan, S. Lee, B. Lim and D. S. Chung, *J. Mater. Chem. C* 2023, **11**, 1560.
- S5.** S. Z. Hassan, J. Song, S. H. Yu and D. S. Chung, *Chem. Mater.* 2021, **33**, 7546.
